# Supplementary material
Source: HighWire-hosted journal article supplement (https://www.ajnr.org/highwire/filestream/66425/field_highwire_adjunct_files/0/19-00006.pdf)
Supplement: 19-00006.pdf [file 19-00006.pdf]

## ON-LINE APPENDIX: METHODS

### Patient Population

In the double-blind phase, the patients received treatment with intramuscular interferon  $\beta$ -1a (30  $\mu$ g/week) alone or in combination with azathioprine (50 mg/day) or azathioprine plus prednisone (10 mg every other day). At the end of the double-blind phase, patients with MS entered first a 3-year extension<sup>1,2</sup> and then a subsequent 5-year extension<sup>3</sup> of studies during which they continued monotherapy with intramuscular interferon  $\beta$ -1a, added other therapies to intramuscular interferon  $\beta$ -1a, or switched to new therapies. At the 10-year follow-up, 74 (42%) were still on intramuscular interferon- $\beta$  1a therapy, while 79 (44.9%) switched to other disease-modifying treatments and 23 (13.1%) discontinued disease-modifying treatment.<sup>3</sup> Because there were no significant treatment differences regarding clinical or MR imaging outcomes during the double-blind study,<sup>4</sup> no subsequent subanalyses according to the original treatment status were performed in the extension phases of the study.<sup>1-3</sup>

### MR Imaging Acquisition and Analysis

T2-LV and its absolute change were calculated using a semiautomated edge detection contouring/thresholding technique.<sup>5</sup> The overall number of new and enlarging T2 lesions among all time points was calculated, as previously described.<sup>6</sup> The normalized brain volume, normalized cortical volume, and normalized ventricle volume were measured using SIENAX,<sup>7</sup> while the percentage brain volume change was analyzed using SIENA (<http://fsl.fmrib.ox.ac.uk/fsl/fslwiki/SIENA>)<sup>7</sup>; the percentage cortical volume change, using SX-MTP3<sup>8</sup>; and percentage ventricle volume change, using VIENA (<https://fsl.fmrib.ox.ac.uk/fsl/fslwiki/SIENA/UserGuide>).<sup>9</sup>

## REFERENCES

1. Horakova D, Cox JL, Havrdova E, et al. **Evolution of different MR imaging measures in patients with active relapsing-remitting multiple sclerosis over 2 and 5 years: a case-control study.** *J Neurol Neurosurg Psychiatry* 2008;79:407–14 CrossRef Medline
2. Zivadinov R, Bergsland N, Dolezal O, et al. **Evolution of cortical and thalamus atrophy and disability progression in early relapsing-remitting MS during five years.** *AJNR Am J Neuroradiol* 2013;34:1931–39 CrossRef Medline
3. Zivadinov R, Uher T, Hagemeyer J, et al. **A serial 10-year follow-up study of brain atrophy and disability progression in RRMS patients.** *Mult Scler* 2016;22:1709–18 CrossRef Medline
4. Havrdova E, Zivadinov R, Krasensky J, et al. **Randomized study of interferon beta-1a, low-dose azathioprine, and low-dose corticosteroids in multiple sclerosis.** *Mult Scler* 2009;15:965–76 CrossRef Medline
5. Zivadinov R, Heininen-Brown M, Schirda CV, et al. **Abnormal subcortical deep-gray matter susceptibility-weighted imaging filtered phase measurements in patients with multiple sclerosis: a case-control study.** *Neuroimage* 2012;59:331–39 CrossRef Medline
6. Zivadinov R, Havrdova E, Bergsland N, et al. **Thalamic atrophy is associated with development of clinically definite multiple sclerosis.** *Radiology* 2013;268:831–41 CrossRef Medline
7. Smith SM, Zhang Y, Jenkinson M, et al. **Accurate, robust, and automated longitudinal and cross-sectional brain change analysis.** *Neuroimage* 2002;17:479–89 CrossRef Medline
8. Dwyer MG, Bergsland N, Zivadinov R. **Improved longitudinal gray and white matter atrophy assessment via application of a 4-dimensional hidden Markov random field model.** *Neuroimage* 2014;90:207–17 CrossRef Medline
9. Vrenken H, Vos EK, van der Flier WM, et al. **Validation of the automated method VIENA: an accurate, precise, and robust measure of ventricular enlargement.** *Hum Brain Mapp* 2014;35:1101–10 CrossRef Medline

**On-line Table 1: MRI baseline and follow-up characteristics in patients with MS, according to the confirmed disability progression at the 10-year follow-up<sup>a</sup>**

|                                    | Total Study Cohort (Mean) (SD) | Stable Group (Mean) (SD) | CDP Group (Mean) (SD) | Cohen d | P Value <sup>b</sup> |
|------------------------------------|--------------------------------|--------------------------|-----------------------|---------|----------------------|
| T2-LV baseline (n = 176)           | 7.80 (10.50)                   | 6.10 (9.80)              | 9.50 (10.90)          | 0.33    | .076                 |
| T2-LV follow-up (n = 176)          | 11.7 (12.8)                    | 9.1 (12)                 | 13.7 (13.2)           | 0.35    | .062                 |
| T2-LV absolute change (n = 153)    | 3.83 (6.72)                    | 2.89 (5.32)              | 4.59 (7.58)           | 0.26    | .190                 |
| New/enlarging T2 lesions (n = 153) | 19.50 (23.10)                  | 18.67 (24.76)            | 20.03 (21.74)         | 0.06    | .753                 |
| Atrophied T2-LV (n = 153)          | 1.11 (1.60)                    | 0.68 (0.85)              | 1.54 (1.90)           | 0.58    | <.001 <sup>c</sup>   |
| NBV baseline (n = 176)             | 1506.23 (80.91)                | 1518.40 (75.80)          | 1497.51 (84.30)       | 0.26    | .523                 |
| PBVC (n = 153)                     | -6.52 (3.73)                   | -5.23 (3.00)             | -7.52 (3.84)          | 0.55    | <.001 <sup>c</sup>   |
| NCV baseline (n = 176)             | 631.1 (43.1)                   | 637.4 (39.2)             | 626.9 (46)            | 0.25    | .879                 |
| PCVC (n = 152)                     | -7.0 (3.2)                     | -6.2 (2.6)               | -7.7 (3.5)            | 0.49    | .001 <sup>c</sup>    |
| NVV baseline (n = 176)             | 41.2 (13.6)                    | 40.1 (11.4)              | 42.2 (14.9)           | 0.16    | .573                 |
| PVVC (n = 152)                     | 42 (35.8)                      | 32.4 (28.1)              | 49.7 (39.5)           | 0.50    | .001 <sup>c</sup>    |

**Note:**—NCV indicates normalized cortical volume; NVV, normalized ventricles volume; NBV, normalized brain volume.

<sup>a</sup> The volumes are presented in milliliters.

<sup>b</sup> The baseline P values were derived using the Student t test, while the follow-up changes in P values were calculated using analysis of covariance corrected for age, sex, and treatment change during the follow-up. The Benjamini-Hochberg correction was used to minimize the false discovery rate, and P values < .05 were considered significant.

<sup>c</sup> Significant P values <.05.

**On-line Table 2: Time course of cumulative new/enlarging T2 lesions on serial MRI in patients with MS, according to the confirmed disability progression status at the 10-year follow-up**

| Months from Baseline | No. in Stable Group | New/Enlarging T2 Lesions Stable Group (Mean) (SD) | No. of Patients with CDP | New/Enlarging T2 Lesions CDP Group (Mean) (SD) | % Difference | Cohen d | P Value <sup>a</sup> |
|----------------------|---------------------|---------------------------------------------------|--------------------------|------------------------------------------------|--------------|---------|----------------------|
| 6 mo                 | 74                  | 1.70 (2.90)                                       | 94                       | 2.50 (3.40)                                    | 47.1         | 0.25    | .240                 |
| 12 mo                | 76                  | 3.43 (6.63)                                       | 95                       | 4.76 (5.39)                                    | 41.2         | 0.23    | .482                 |
| 24 mo                | 68                  | 5.50 (8.63)                                       | 85                       | 7.90 (8.37)                                    | 43.6         | 0.28    | .293                 |
| 36 mo                | 67                  | 7.75 (11.30)                                      | 89                       | 11.85 (16.75)                                  | 56.6         | 0.30    | .185                 |
| 48 mo                | 68                  | 9.91 (15.28)                                      | 87                       | 13.19 (14.96)                                  | 33.3         | 0.22    | .442                 |
| 60 mo                | 67                  | 12.64 (19.75)                                     | 91                       | 15.58 (18.49)                                  | 23.8         | 0.16    | .670                 |
| 72 mo                | 66                  | 14.49 (22.17)                                     | 87                       | 16.97 (19.29)                                  | 17.2         | 0.12    | .893                 |
| 84 mo                | 68                  | 15.55 (23.00)                                     | 85                       | 17.96 (19.93)                                  | 16.1         | 0.12    | .909                 |
| 96 mo                | 67                  | 16.85 (23.45)                                     | 87                       | 18.70 (20.75)                                  | 11.3         | 0.09    | .986                 |
| 108 mo               | 68                  | 17.75 (23.90)                                     | 84                       | 19.32 (21.40)                                  | 9.7          | 0.07    | .993                 |
| 120 mo               | 68                  | 18.67 (24.76)                                     | 85                       | 20.03 (21.74)                                  | 7.0          | 0.06    | .885                 |

<sup>a</sup> P values, percentage difference, and Cohen d effect size represent the CDP-vs-stable group comparisons. The follow-up changes in P values were calculated using analysis of covariance corrected for age, sex, and treatment change at each time point. The Benjamini-Hochberg correction was used to minimize the false discovery rate, and P values < .05 were considered significant.

**On-line Table 3: Time course of absolute T2 lesion volume changes on serial MRI in patients with MS, according to the confirmed disability progression status at the 10-year follow-up<sup>a</sup>**

| Months from Baseline | No. in Stable Group | T2-LV Absolute Change Stable Group (Mean) (SD) | No. of Patients with CDP | T2-LV Absolute Change CDP Group (Mean) (SD) | % Difference | Cohen d | P Value <sup>b</sup> |
|----------------------|---------------------|------------------------------------------------|--------------------------|---------------------------------------------|--------------|---------|----------------------|
| 6 mo                 | 74                  | 0.46 (1.50)                                    | 94                       | 0.83 (2.40)                                 | 80.4         | 0.18    | .340                 |
| 12 mo                | 76                  | 0.74 (1.70)                                    | 95                       | 1.30 (2.53)                                 | 75.7         | 0.26    | .198                 |
| 24 mo                | 68                  | 1.10 (2.14)                                    | 85                       | 1.78 (3.40)                                 | 61.8         | 0.24    | .243                 |
| 36 mo                | 67                  | 1.45 (2.30)                                    | 89                       | 2.31 (4.72)                                 | 59.3         | 0.23    | .252                 |
| 48 mo                | 68                  | 1.53 (2.72)                                    | 87                       | 2.56 (5.94)                                 | 67.3         | 0.22    | .278                 |
| 60 mo                | 67                  | 1.97 (3.32)                                    | 91                       | 2.97 (6.33)                                 | 50.8         | 0.20    | .332                 |
| 72 mo                | 66                  | 2.70 (5.40)                                    | 87                       | 3.64 (7.14)                                 | 34.8         | 0.15    | .435                 |
| 84 mo                | 68                  | 2.89 (5.18)                                    | 85                       | 4.00 (7.26)                                 | 38.4         | 0.18    | .374                 |
| 96 mo                | 67                  | 2.87 (5.22)                                    | 87                       | 4.17 (7.46)                                 | 45.3         | 0.20    | .316                 |
| 108 mo               | 68                  | 2.76 (5.36)                                    | 84                       | 4.00 (7.37)                                 | 70.5         | 0.19    | .340                 |
| 120 mo               | 68                  | 2.89 (5.32)                                    | 85                       | 4.59 (7.58)                                 | 58.8         | 0.26    | .190                 |

<sup>a</sup> The volumes are presented in milliliters.

<sup>b</sup> P values, percentage difference, and Cohen d effect size represent the CDP-vs-stable group comparisons. The follow-up changes in P values were calculated using analysis of covariance corrected for age, sex, and treatment change at each time point. The Benjamini-Hochberg correction was used to minimize the false discovery rate, and P values < .05 were considered significant.

**On-line Table 4: Time course of cortical brain atrophy on serial MRI in patients with MS, according to the confirmed disability progression status at the 10-year follow-up**

| Months from Baseline | No. in Stable Group | PCVC Stable Group (Mean) (SD) | No. of Patients with CDP | PCVC CDP Group (Mean) (SD) | % Difference | Cohen d | P Value <sup>a</sup> |
|----------------------|---------------------|-------------------------------|--------------------------|----------------------------|--------------|---------|----------------------|
| 6 mo                 | 74                  | -0.93 (2.16)                  | 94                       | -1.13 (2.34)               | 21.5         | 0.09    | .572                 |
| 12 mo                | 76                  | -1.40 (2.10)                  | 95                       | -1.90 (2.26)               | 35.7         | 0.23    | .164                 |
| 24 mo                | 68                  | -2.19 (2.56)                  | 85                       | -2.83 (2.01)               | 29.2         | 0.28    | .083                 |
| 36 mo                | 67                  | -3 (2.50)                     | 89                       | -3.34 (2.84)               | 11.3         | 0.13    | .426                 |
| 48 mo                | 68                  | -3.33 (2.27)                  | 87                       | -4.04 (3.08)               | 21.3         | 0.26    | .116                 |
| 60 mo                | 67                  | -3.86 (2.67)                  | 91                       | -5.08 (2.90)               | 31.6         | 0.44    | .008 <sup>b</sup>    |
| 72 mo                | 66                  | -4.09 (2.44)                  | 87                       | -5.30 (3.08)               | 29.6         | 0.44    | .009 <sup>b</sup>    |
| 84 mo                | 68                  | -4.61 (2.76)                  | 85                       | -5.89 (3.15)               | 27.8         | 0.43    | .009 <sup>b</sup>    |
| 96 mo                | 67                  | -5.20 (2.75)                  | 87                       | -6.59 (3.15)               | 26.7         | 0.47    | .005 <sup>b</sup>    |
| 108 mo               | 68                  | -5.01 (2.64)                  | 84                       | -6.72 (3.30)               | 34.1         | 0.57    | .001 <sup>b</sup>    |
| 120 mo               | 68                  | -6.22 (2.60)                  | 84                       | -7.71 (3.50)               | 24           | 0.49    | .001 <sup>b</sup>    |

<sup>a</sup> P values, percentage difference, and Cohen effect size represent the CDP-vs-stable group comparisons. The follow-up changes in P values were calculated using analysis of covariance corrected for age, sex, and treatment change at each time point. The Benjamini-Hochberg correction was used to minimize the false discovery rate, and P values < .05 were considered significant.

<sup>b</sup> Significant P values < .05.

**On-line Table 5: Time course of central brain atrophy on serial MRI in patients with MS, according to the confirmed disability progression status at the 10-year follow-up**

| Months from Baseline | No. in Stable Group | PVVC Stable Group (Mean) (SD) | No. of Patients with CDP | PVVC CDP Group (Mean) (SD) | % Difference | Cohen d | P Value <sup>a</sup> |
|----------------------|---------------------|-------------------------------|--------------------------|----------------------------|--------------|---------|----------------------|
| 6 mo                 | 76                  | 4.57 (6.44)                   | 95                       | 5.90 (6.11)                | 29.1         | 0.21    | .170                 |
| 12 mo                | 76                  | 6.44 (8.53)                   | 95                       | 9.44 (10.90)               | 46.7         | 0.31    | .051                 |
| 24 mo                | 68                  | 9.53 (9.44)                   | 85                       | 14.37 (15.54)              | 50.8         | 0.38    | .025 <sup>b</sup>    |
| 36 mo                | 67                  | 13.38 (13.34)                 | 89                       | 22.55 (23.50)              | 68.5         | 0.48    | .008 <sup>b</sup>    |
| 48 mo                | 68                  | 17.12 (15.56)                 | 87                       | 26.68 (25.09)              | 55.8         | 0.46    | .007 <sup>b</sup>    |
| 60 mo                | 67                  | 18.98 (18.78)                 | 91                       | 33.50 (30.31)              | 76.5         | 0.57    | .001 <sup>b</sup>    |
| 72 mo                | 66                  | 21.92 (20.72)                 | 87                       | 35.11 (31.06)              | 60.2         | 0.50    | .001 <sup>b</sup>    |
| 84 mo                | 68                  | 24.82 (23.46)                 | 85                       | 43.52 (35.99)              | 75.3         | 0.62    | <.001 <sup>b</sup>   |
| 96 mo                | 67                  | 28.96 (25.80)                 | 87                       | 44.30 (33.14)              | 52.3         | 0.52    | .001 <sup>b</sup>    |
| 108 mo               | 68                  | 28.95 (26.77)                 | 84                       | 48.31 (36.23)              | 66.9         | 0.61    | <.001 <sup>b</sup>   |
| 120 mo               | 68                  | 32.37 (28.11)                 | 84                       | 49.65 (39.51)              | 53.4         | 0.50    | .001 <sup>b</sup>    |

<sup>a</sup> P values, percentage difference, and Cohen effect size represent the CDP-vs-stable group comparisons. The follow-up changes in P values were calculated using analysis of covariance corrected for age, sex, and treatment change at each time point. The Benjamini-Hochberg correction was used to minimize the false discovery rate, and P values < .05 were considered significant.

<sup>b</sup> Significant P values < .05.

**On-line Table 6: Time course of atrophied T2 lesion volume between consecutive MRI time points in patients with MS, according to the confirmed disability progression status at the 10-year follow-up<sup>a</sup>**

| Time Points | No. in Stable Group | Atrophied T2-LV Stable Group Mean (SD) | No. of Patients with CDP | Atrophied T2-LV CDP Group Mean (SD) | % Difference | Cohen d | P Value <sup>b</sup> |
|-------------|---------------------|----------------------------------------|--------------------------|-------------------------------------|--------------|---------|----------------------|
| 0-6 mo      | 74                  | 0.05 (0.09)                            | 90                       | 0.12 (0.16)                         | 140          | 0.54    | .004 <sup>c</sup>    |
| 6-12 mo     | 74                  | 0.04 (0.08)                            | 90                       | 0.10 (0.15)                         | 150          | 0.50    | .012 <sup>c</sup>    |
| 12-24 mo    | 68                  | 0.05 (0.09)                            | 80                       | 0.16 (0.29)                         | 220          | 0.51    | .004 <sup>c</sup>    |
| 24-36 mo    | 62                  | 0.08 (0.20)                            | 76                       | 0.14 (0.21)                         | 75           | 0.29    | .190                 |
| 36-48 mo    | 62                  | 0.08 (0.15)                            | 79                       | 0.17 (0.32)                         | 112.5        | 0.36    | .075                 |
| 48-60 mo    | 62                  | 0.07 (0.12)                            | 80                       | 0.14 (0.18)                         | 100          | 0.46    | .014 <sup>c</sup>    |
| 60-72 mo    | 60                  | 0.09 (0.14)                            | 85                       | 0.19 (0.28)                         | 111.1        | 0.45    | .012 <sup>c</sup>    |
| 72-84 mo    | 61                  | 0.10 (0.15)                            | 81                       | 0.23 (0.31)                         | 130          | 0.53    | .004 <sup>c</sup>    |
| 84-96 mo    | 61                  | 0.11 (0.21)                            | 80                       | 0.21 (0.27)                         | 90.9         | 0.41    | .061                 |
| 96-108 mo   | 62                  | 0.08 (0.20)                            | 80                       | 0.17 (0.20)                         | 112.5        | 0.45    | .007 <sup>c</sup>    |
| 108-120 mo  | 64                  | 0.08 (0.10)                            | 79                       | 0.20 (0.30)                         | 150          | 0.54    | .004 <sup>c</sup>    |

<sup>a</sup> The volumes are presented in milliliters.

<sup>b</sup> P values, percentage difference, and Cohen d effect size represent the CDP-vs-stable group comparisons. The follow-up changes in P values were calculated using analysis of covariance corrected for age, sex, and treatment change at each time point. The Benjamini-Hochberg correction was used to minimize the false discovery rate, and P values < .05 were considered significant.

<sup>c</sup> Significant P values < .05.

**On-line Table 7: Time course of whole-brain atrophy between consecutive MRI time points in patients with MS, according to the confirmed disability progression status at the 10-year follow-up**

| Time Points | No. in Stable Group | PBVC Stable Group (Mean) (SD) | No. of Patients with CDP | PBVC CDP Group (Mean) (SD) | % Difference | Cohen d | <i>P</i> Value <sup>a</sup> |
|-------------|---------------------|-------------------------------|--------------------------|----------------------------|--------------|---------|-----------------------------|
| 0–6 mo      | 74                  | –0.24 (0.80)                  | 94                       | –0.34 (1.00)               | 47.8         | 0.11    | .396                        |
| 6–12 mo     | 74                  | –0.24 (0.77)                  | 90                       | –0.46 (0.91)               | 91.7         | 0.26    | .170                        |
| 12–24 mo    | 68                  | –0.50 (0.86)                  | 80                       | –0.81 (1.19)               | 62.0         | 0.30    | .133                        |
| 24–36 mo    | 62                  | –0.74 (1.63)                  | 76                       | –1.31 (1.83)               | 77.0         | 0.33    | .099                        |
| 36–48 mo    | 62                  | –0.65 (1.01)                  | 79                       | –0.95 (1.59)               | 46.2         | 0.23    | .278                        |
| 48–60 mo    | 62                  | –0.53 (1.31)                  | 80                       | –0.84 (1.22)               | 58.5         | 0.24    | .215                        |
| 60–72 mo    | 60                  | –0.50 (1.05)                  | 85                       | –0.87 (1.50)               | 54.0         | 0.29    | .172                        |
| 72–84 mo    | 61                  | –0.53 (0.95)                  | 81                       | –0.90 (1.50)               | 69.8         | 0.29    | .144                        |
| 84–96 mo    | 61                  | –0.64 (1.09)                  | 80                       | –0.56 (1.10)               | –21.4        | 0.07    | .130                        |
| 96–108 mo   | 62                  | –0.24 (0.90)                  | 80                       | –0.40 (1.06)               | 66.7         | 0.16    | .724                        |
| 108–120 mo  | 64                  | –0.45 (0.87)                  | 79                       | –0.51 (1.03)               | 13.3         | 0.06    | .415                        |

<sup>a</sup> *P* values, percentage difference, and Cohen *d* effect size represent the CDP-vs-stable group comparisons. The follow-up changes in *P* values were calculated using analysis of covariance corrected for age, sex, and treatment change at each time point. The Benjamini-Hochberg correction was used to minimize the false discovery rate, and *P* values < .05 were considered significant.

● CDP    ● no-CDP

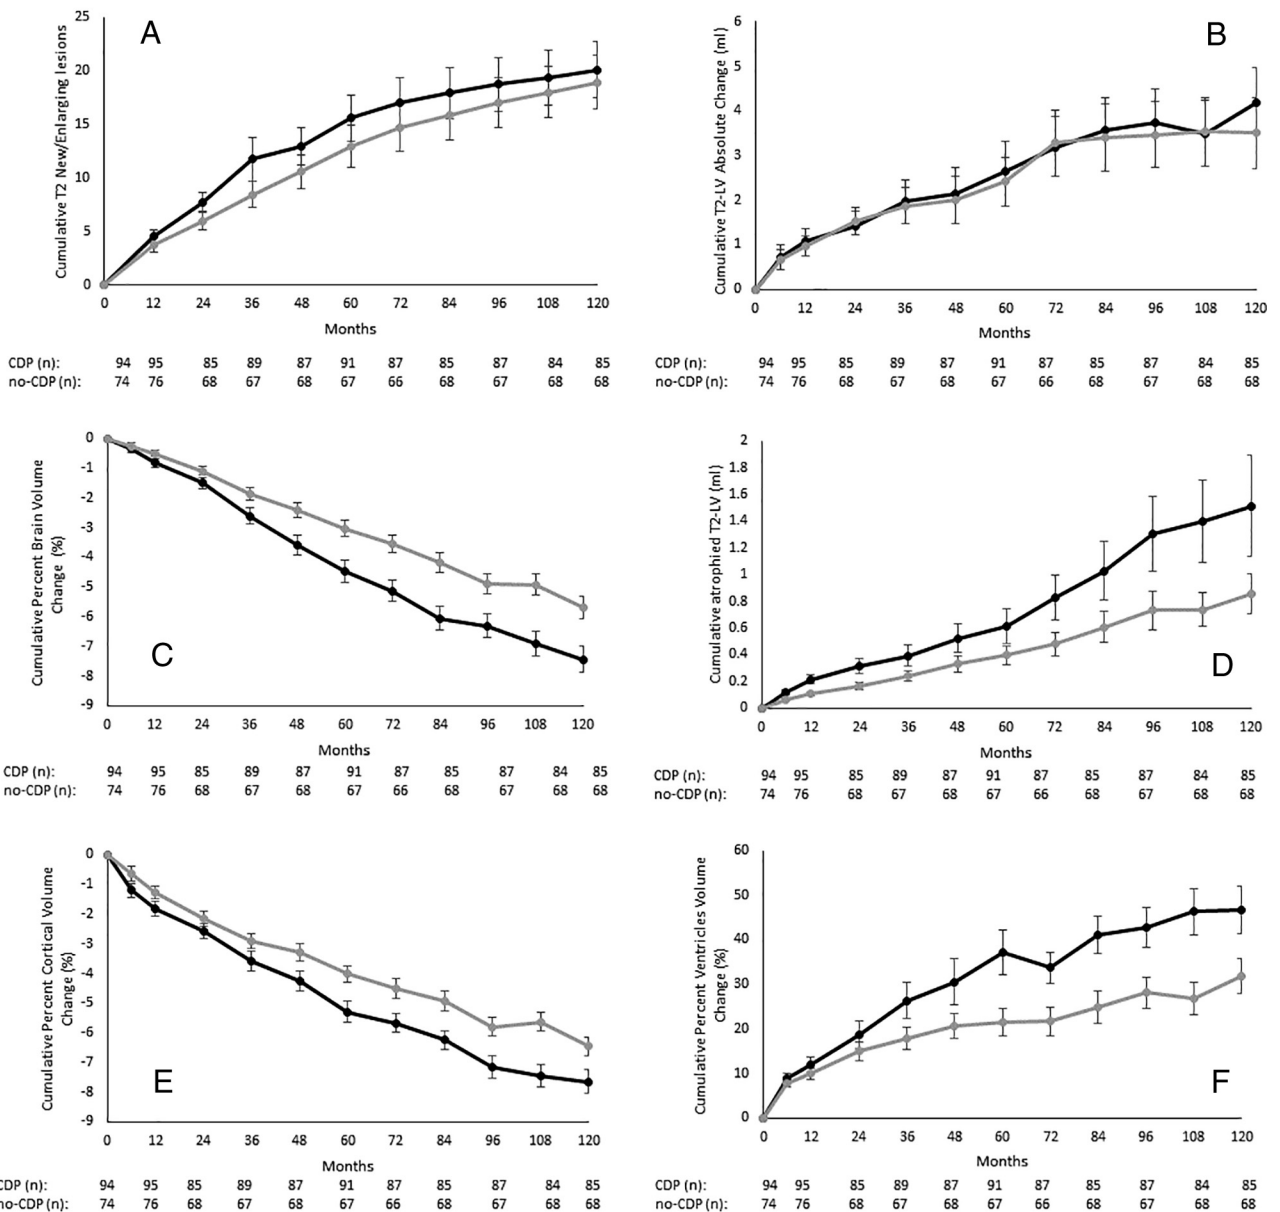

**ON-LINE FIGURE.** Accumulation of cumulative new and enlarging T2 lesions (A), absolute change in T2 lesion volume (B), percentage brain volume change (C), atrophied brain lesion volume (D), percentage cortical volume change (E), and percentage ventricle volume change (F) during 10 years between patients with MS with and without confirmed disability progression at the follow-up. Error bars represent standard error of the mean.
